# Supplementary material
Source: publisher figshare collection journal article supplement (https://gsapubs.figshare.com/ndownloader/files/22410360)
Supplement: Supplementary file 1 [file 22410360]

**Table S3. Terrigenous lithofacies**

| Lithofacies           | Descriptions                                                                                                                                                                                                            | Depositional environments                                                                                                                                        |
|-----------------------|-------------------------------------------------------------------------------------------------------------------------------------------------------------------------------------------------------------------------|------------------------------------------------------------------------------------------------------------------------------------------------------------------|
| Massive diamictite    | Unstratified, sheared or unsheared, wackestone with matrix-supported heterolithic pebbles and boulders, generally subrounded, faceted and striated clasts                                                               | Subglacial and ice-proximal subaqueous settings, lodgement-, sublimation- and melt-out tills, in some cases redeposited downslope                                |
| Stratified diamictite | Laminated and bedded suspension fallout containing outsized dropstones with impact-related features (e.g., punctured layers, raised rims, overturned flaps), turbidites and debrites, slumps and cryokinetic structures | Subaqueous periglacial, ice grounding-zones particularly of ice streams, proximal ice-shelf rafting, far-travelled iceberg rafting, hypopycnal suspension plumes |
| Sorted diamictite     | Well-sorted arenite or fine-grained rudite containing outsized dropstones, climbing ripples, crossbedding, commonly channelized within massived diamictite or as wedges within stratified diamictite                    | Sub- and intraglacial melt-water tunnels, grounding-line tunnel-mouth fans, sub-ice shelf tidal channels                                                         |
| Conglomerate          | Clast-supported rudite, clasts subrounded to well-rounded, generally stratified with sand-rich lenses and zones, graded or reverse graded, paleo-calcrete                                                               | Alluvial fans and steep-gradient rivers, proglacial outwash (sandur)                                                                                             |
| Sandstone             | Grain-supported arenite, generally well-bedded, commonly crossbedded, ripple marks, current lineation, pebble lags and lenses may be present                                                                            | Aeolian, riverine, deltaic, and wave- or tide-dominated coastal systems, off-shore bars, slope channels and fans                                                 |
| Siltstone             | Grain-supported siltstone, generally thin-bedded, may be interstratified with fine-grained sandstone and/or argillite, low-angle cross-stratification, wave or current ripples, turbidites, mudcracks if desiccated     | Riverine levees and deltas, open and semi-restricted shelves, slope-channel levees and fans                                                                      |
| Argillite             | Terrigenous mudrock, massive to foliated, parallel-sided laminae, terrigenous or carbonate turbidites, authigenic sulfide and carbonate                                                                                 | Lakes, coastal lagoons, restricted shelves, basin floors                                                                                                         |
